1

2 **Title: GSK3 Controls Migration of the Neural Crest Lineage**

3

4

5

6 **Authors:** Sandra G. Gonzalez Malagon<sup>1</sup>, Anna M. Lopez Muñoz<sup>1,6</sup>, Daniel Doro<sup>1,6</sup>, Triòna  
7 G. Bolger<sup>1,6</sup>, Evon Poon<sup>4</sup>, Elizabeth R. Tucker<sup>4</sup>, Hadeel Adel Al-Lami<sup>1</sup>, Matthias Krause<sup>2</sup>,  
8 Christopher Phiel<sup>3</sup>, Louis Chesler<sup>4</sup> and Karen J. Liu<sup>1,4</sup>

9

10 **Affiliations**

11 <sup>1</sup>*Craniofacial Development and Stem Cell Biology, King's College London, London, SE1*  
12 *9RT, United Kingdom*

13 <sup>2</sup>*Randall Division of Cell & Molecular Biophysics, King's College London, London, SE1*  
14 *1UL, United Kingdom*

15 <sup>3</sup>*University of Colorado Denver, Department of Integrative Biology, Denver, CO 80204*

16 <sup>4</sup>*Divisions of Clinical Studies, The Institute for Cancer Research, London and The Royal*  
17 *Marsden NHS Trust, United Kingdom*

18

19 <sup>5</sup>Correspondence to: [karen.liu@kcl.ac.uk](mailto:karen.liu@kcl.ac.uk)

20 <sup>6</sup>These authors contributed equally.

21

22

23

24 **Keywords:** neural crest, neuroblastoma, glycogen synthase kinase 3, GSK3, anaplastic  
25 lymphoma kinase, ALK, mouse, *Xenopus*, migration

26

26

27 **Abstract**

28 Migration of the neural crest lineage is critical to its physiological function. Mechanisms  
29 controlling neural crest migration are comparatively unknown, due to difficulties accessing  
30 this cell population *in vivo*. Here, we uncover novel requirements of glycogen synthase  
31 kinase 3 (GSK3) in regulating the neural crest. We demonstrate that GSK3 is tyrosine  
32 phosphorylated (pY) in neural crest cells and that this activation depends on anaplastic  
33 lymphoma kinase (ALK), a protein associated with neuroblastoma. Consistent with this,  
34 neuroblastoma cells with pathologically increased ALK activity express high levels of pY-  
35 GSK3 and migration of these cells can be inhibited by GSK3 or ALK blockade. In normal  
36 neural crest cells, loss of GSK3 leads to increased pFAK and misregulation of Rac1 and  
37 lamellipodin, key regulators of cell migration. Genetic reduction of GSK-3 results in failure  
38 of migration. All together, this work identifies a role for GSK3 in cell migration during  
39 neural crest development and cancer.

40

41 The neural crest is a vertebrate-specific, motile population of cells born at the junction  
42 of the neural and non-neural ectoderm. This lineage has contributed to our understanding of  
43 cellular behaviours, such as contact inhibition of locomotion<sup>1</sup>. It is the origin of many cell  
44 types found throughout the organism, including melanocytes, peripheral neurons, cardiac  
45 outflow tract, and the craniofacial skeleton. Recent reports have highlighted the importance  
46 of neural crest cells: their stem-like capacity, their ability to reprogram, to become cancerous,  
47 and to drive vertebrate evolution<sup>2-5</sup>. The highly migratory activity of these cells is critical to  
48 their *in vivo* function, not only are their ultimate tissue descendants widespread in the  
49 organism, but failure to regulate migration and differentiation in the correct locations is  
50 associated with diseases like neuroblastoma<sup>6-8</sup>. Despite its importance, the specific  
51 mechanisms underlying this migratory activity and its control are poorly understood.

52 In our previous work, we demonstrated a critical role for the pleiotropic kinase GSK3  
53 in craniofacial development<sup>9</sup>; therefore, we sought to understand the regulation of GSK3 in  
54 neural crest cells, which are integral to most of the craniofacial structures. In vertebrates, the  
55 serine/threonine kinase GSK3 is encoded by two paralogous genes, *GSK3 $\alpha$*  and *GSK3 $\beta$* ,  
56 which are nearly identical throughout their kinase domains<sup>10,11</sup>, and have over 100 predicted  
57 substrates<sup>11,12</sup>. The effect of GSK3 phosphorylation is substrate dependent and variable,

58 ranging from control of protein degradation ( $\beta$ -catenin, MYC) and localization (NFAT), to  
59 trafficking (amyloid precursor protein) and cleavage (Gli)<sup>11</sup>.

60 Given the seemingly ubiquitous expression of GSK3 it is not surprising that fine-  
61 tuning of this kinase activity is very complex and not well understood, especially *in vivo*.  
62 GSK3 can be inhibited by N-terminal serine phosphorylations on both GSK3 $\alpha$  (serine-  
63 21/S21) and GSK3 $\beta$  (serine-9/S9). These serines are targeted by kinases such as protein  
64 kinase A (PKA) and protein kinase B (PKB/AKT) and phosphorylation at these serines  
65 prevents GSK3 binding to its substrates<sup>13</sup>. However, interestingly, mouse mutants carrying  
66 non-phosphorylatable alanine substitutions at these sites (*GSK3 $\alpha$ <sup>S21A/S21A</sup>*; *GSK3 $\beta$ <sup>S9A/S9A</sup>*)  
67 have no obvious developmental phenotypes and are fertile<sup>13</sup>. Using this rigorous approach,  
68 functional defects in these animals were limited to regulation of glycogen synthase activity  
69 in response to insulin<sup>13</sup>. This evidence that regulation of GSK3 via PKB-dependent serine  
70 phosphorylation is dispensible for embryogenesis raises the possibility that additional  
71 regulatory mechanisms may be important for GSK3 activity *in utero*. Indeed, inhibition of  
72 GSK3 activity by Wnt ligands is serine independent. Instead, inhibition appears to occur  
73 via sequestration of GSK3 in response to ligand<sup>14</sup>. This suggests that there exist distinct  
74 pools of GSK3 within the cell which are poised for activity.

75 One positive regulatory mechanism may be via phosphorylation of conserved tyrosine  
76 residues (GSK3 $\alpha$ -Y279, GSK3 $\beta$ -Y216) which can change the target selectivity of GSK3<sup>15</sup>.  
77 While these can be autophosphorylations<sup>16,17</sup>, a recent computational study identified GSK3 $\alpha$   
78 as a specific substrate for the kinase ALK, which is often pathologically increased in  
79 neuroblastoma cells<sup>18</sup>. However, these *in silico* predictions had not been validated *in vivo* and  
80 there had been no studies describing the tissue localisation of this phosphorylation. Given the  
81 importance of ALK in pathogenesis of neural crest-derived cancers, we considered the  
82 possibility that phosphorylation of these tyrosines might be an important mechanism for  
83 ALK-dependent tuning of GSK3 activity, which should be specific to the neural crest lineage.  
84 Indeed, we identified specific expression of ALK and phospho-tyrosine GSK3 in the  
85 delaminating neural crest cells, as well as a requirement for GSK3 in the control of neural  
86 crest and neuroblastoma cell migration.

87 As noted above, GSK3 is notoriously promiscuous, with many predicted substrates.  
88 This has led to reported targets involved in a broad range of biological processes such as  
89 senescence, cell proliferation, axonal outgrowth and signaling. GSK3 is also considered a  
90 prime therapeutic target in diverse diseases such as diabetes, depression, neurodegeneration,

91 cancer and retinitis pigmentosa<sup>19,20</sup>. As a consequence it is thought that regulation of GSK3  
92 target selection is very context dependent.

93 Even focusing on the neural crest lineage, GSK3 is thought to have multiple  
94 sequential roles beginning with a requirement in patterning of the dorsal axis<sup>21-23</sup>. Based  
95 primarily on data from chicken and frog, neural crest-specific GSK3 targets include the Wnt  
96 effector  $\beta$ -catenin, the metalloprotease ADAM13 and transcription factors snail and twist<sup>24-26</sup>.  
97 Wnt dependent inhibition of GSK3 is clearly necessary for  $\beta$ -catenin-mediated transcriptional  
98 activation during neural crest induction<sup>27</sup>. GSK3 also has proposed roles in the  
99 phosphorylation of Twist and Snail, proteins which can regulate the activity and stability of  
100 these targets, thus controlling the onset of the epithelial-mesenchymal transition (EMT)<sup>24</sup>.  
101 Concurrently, GSK3 interactions with ADAM13 are proposed to be crucial for delamination  
102 and entry into the EMT<sup>25</sup>. Given the variety of substrates and the precise timing of  
103 development, there is no doubt that GSK3 activity must to be dynamically regulated during  
104 neural crest development. However, as noted, mice lacking the inhibitory phosphorylation  
105 sites at S21/S9-GSK3 $\alpha/\beta$  have normal craniofacial development and are viable<sup>13</sup>. Therefore,  
106 we focus on positive regulation of GSK3 via activating tyrosine phosphorylations.

107 Here, our analysis uncovers a surprisingly specific activation of GSK3 in neural crest  
108 cells as they depart from the neuroepithelium and become migratory mesenchymal cells. This  
109 activation is controlled by anaplastic lymphoma kinase, which has been implicated in  
110 neuroblastoma and other cancers. Genetic and pharmacological loss of GSK3 activity leads to  
111 cytoskeletal changes in migratory neural crest cells as well as in neuroblastoma, raising the  
112 possibility that control of GSK3 is a rapid and reversible mechanism for controlling cell  
113 migration dynamics in the neural crest lineage.

114

## 115 **Results**

116 *GSK3 is expressed, and specifically tyrosine phosphorylated, in migrating neural crest cells*

117 In the embryo, neural crest cells are induced at the neuroepithelial border,  
118 subsequently delaminating and becoming migratory. To confirm whether GSK3 was  
119 preferentially enriched during neural crest cell migration, we examined mRNA and reporter  
120 gene expression for both paralogous genes in frog and mouse, and found that these genes  
121 were indeed expressed in migratory neural crest (Figure 1A-H). We noted in particular the  
122 enrichment of GSK3 expression in the neural plate stages, at the border of the neural plate  
123 (NPB) (Figure 1E, E', G, G') and later on in the migratory neural crest cell population,

124 including that destined for the first branchial arch (marked by 1, Figure 1B, D, F, H). The  
125 close protein similarity between GSK3 in frog and mouse, as well as the similar expression  
126 patterns, suggests that GSK3 activity may play a conserved role in the vertebrate neural crest.

127 We were then curious whether GSK3 proteins were activated at specific time points  
128 during murine neural crest development. To address this, we used an antibody recognizing a  
129 phosphorylated tyrosine in the active site of both GSK3 isoforms (pY279-GSK3 $\alpha$ /pY216-  
130 GSK3 $\beta$ , referred to hereafter as pY-GSK3). These sites are identical in the two proteins. pY-  
131 GSK3 (green) was specifically detected in the cranial neural crest cell population (marked by  
132 P75-NTR, red) after emigration from the neural tube (Figure 1I). This was in contrast to more  
133 widespread mRNA expression of GSK3 $\alpha$ / $\beta$  seen above (Figure 1A-H). This phosphorylation  
134 was also confirmed in a simple *ex vivo* culture system, which allows us to visualize and  
135 manipulate specific neural crest populations without complications from surrounding tissues  
136 (Figure 1J). In these assays, neural plates from embryonic day 8.5 (E8.5) mouse embryos  
137 were explanted and cultured *in vitro*, prior to neural crest migration, allowing subsequent  
138 examination of delaminating neural crest cells. By 24 hours of culture, the premigratory  
139 neural crest cells (pNC) are spread in an epithelial sheet surrounding the neural plate (NP),  
140 with fully migratory cells (mNC) in the outer ring (Figure 1K). Again, we noted that pY-  
141 GSK3 is specifically found in neural crest cells just when they delaminate and become  
142 mesenchymal (Figure 1L-M). In fully migratory cells, the majority of pY-GSK3 appears  
143 perinuclear and is invariably oriented in the direction of migration (Figure 1L-L'). In  
144 contrast, staining for total GSK3 appears diffuse and ubiquitous (Figure 1N).

145

#### 146 *In vivo loss of GSK3 $\alpha$ / $\beta$ prevents migration of cranial neural crest cells*

147 We then turned to mouse mutants to determine the *in vivo* genetic requirements for  
148 GSK3 in the neural crest. To do this, we generated embryos with a conditional deletion of  
149 both GSK3 $\alpha$  and GSK3 $\beta$  genes using a neural crest specific cre-recombinase driver  
150 (*Wnt1::cre*<sup>28</sup>). By E9.5, we found widening of the neural plate (Figure 2A, 2E, red bracket),  
151 with a medial expansion of *Sox10* expression (Figure 2A, 2E, asterisk). By E10.5, dorsal  
152 views revealed an accumulation of *Sox10* positive cells in the brain (Fig 2F, red bracket),  
153 suggesting that the cranial neural crest cells have failed to migrate from the neural tube.  
154 Complete nulls had a severe disruption of cell migration to the facial prominences, the  
155 branchial arches and the cranial ganglia (compare *Sox10* positive/blue in Figure 2C-D to 2G-  
156 H). Because we rarely found animals surviving beyond E11.5, we also examined animals

157 carrying a single allele of functional GSK3 (*Wnt1::cre; GSK3 $\alpha^{fl/+};\beta^{fl/fl}$*  or *Wnt1::cre;*  
158 *GSK3 $\alpha^{fl/fl};\beta^{fl/+}$* ). In both cases, we noted a reduction in *Sox10* positive cells en route to the first  
159 branchial arch and an accumulation of positive staining in the neural tube, suggesting that  
160 both GSK3 proteins contribute to migration of the neural crest (Supplemental Figure 1, red  
161 bracket).

162 While the timing of the *Wnt1::cre* transgene misses the initiation of neural crest  
163 induction, it was still possible that some of the effects seen were due to GSK3 requirements  
164 in the pre-migratory neural crest. In order to bypass early effects on the neural crest we  
165 turned to pharmacological inhibition of GSK3 using the specific inhibitor BIO (6-  
166 bromoindirubin-3'-oxime<sup>29</sup>). Making use of *Xenopus* allowed us to precisely time our  
167 manipulations in a well-defined *in vivo* system. Treatments of *Xenopus* embryos confirmed  
168 that GSK3 inhibition led to loss of the migration marker *twist1* (Figure 2I). Treatment of  
169 *Xenopus* embryos at stage 12.5 confirmed that GSK3 inhibition led to loss of *twist1*. When  
170 the embryos were released from treatment at stage 19, we found some recovery of *twist1*  
171 expression (Figure 2K). Loss of GSK3 function during the critical stages led to significant  
172 changes in face shape as well as a smaller neural crest derived tail fin (Supplemental Figure  
173 2A-C), as well as loss of the neural crest derived facial cartilages (Figure 2J, L). Although the  
174 facial cartilages were lost leading to narrowing of the head, the mesodermal cranial muscles  
175 are still formed (Supplemental Figure 2D). To confirm that this effect was specifically due to  
176 impairment of migration, we transplanted fluorescently labeled neural crest cells into a st.17  
177 embryo and then treated with BIO; these cells did not migrate (Figure 2N-P'). Taken  
178 together, this demonstrated a previously under-appreciated role for GSK3 during neural crest  
179 cell migration.

180

### 181 *Perturbing GSK3 function prevents migration of cranial neural crest cells*

182 To bypass the neural crest induction stage as well as the embryonic lethality, we  
183 turned back to the neural crest explant cultures. We found that dispersion of *Xenopus* cells  
184 was inhibited by BIO treatment (Figure 3A-C). Note that in the *Xenopus* explants, the  
185 premigratory neural crest population can be specifically dissected independently from the  
186 neural plate. We then turned back to mouse neural crest cultures in order to better compare  
187 our pharmacological inhibitors to genetic mutants. Treatment with two different specific  
188 inhibitors, BIO and CHIR99021 (CHIR<sup>30</sup>) prevented neural crest cell migration similar to that  
189 observed in *Xenopus* (Fig 3D-I, Supplemental Movies 1-2). We found that the area covered

190 by the pre-migratory neural crest cells was expanded in treated samples (Supplemental Figure  
191 3A, 3B) with a concurrent decrease in the migratory population (Supplemental Figure 3B),  
192 suggesting a defect or delay in the cells emigrating from the leading edge of the  
193 neuroepithelium. This was confirmed in genetic mutants, where a complete loss of GSK3  
194 (*Wnt1::cre; GSK3 $\alpha$ <sup>fl/fl</sup>;  $\beta$ <sup>fl/fl</sup>*) also led to a decrease in migratory neural crest cells (Figure 3J-  
195 L).

196 One possibility was that inhibitory serine phosphorylation of GSK3 is necessary at the  
197 leading edge of polarized cells as has been demonstrated in astrocytes and neurons<sup>31-34</sup>.  
198 However, mouse mutants carrying non-phosphorylatable S21A/S9A substitutions  
199 (*GSK3 $\alpha$ <sup>S21A/S21A</sup>; GSK3 $\beta$ <sup>S9A/S9A</sup>*) are viable, suggesting normal neural crest migration<sup>13</sup>.  
200 Nevertheless, to confirm this, we observed that neural crest explants from these mice appear  
201 normal and retain sensitivity to BIO inhibition, demonstrating that serine phosphorylation of  
202 GSK3 is dispensable during neural crest migration (Supplemental Figure 4A-B). Therefore,  
203 because of the polarized expression of pY-GSK3 at the leading edge, we decided to focus on  
204 the role of GSK3 as the neural crest cells acquire their mesenchymal nature.

205

#### 206 *GSK3 inhibition perturbs the cytoskeleton*

207 GSK3 activity has been predicted to control cytoskeletal dynamics in a number of  
208 systems. The loss of cell migration in mutant or BIO treated cultures suggested a disruption  
209 of cytoskeletal dynamics; therefore, we examined the actin and microtubule arrangements in  
210 neural crest cells after inhibition of GSK3 (Figure 3M-T). GSK3 inhibition markedly  
211 increased stress fibres and concurrently reduced leading-edge actin (Figure 3M-P),  
212 Supplemental Figure 5A). Cell shapes at the leading edge were markedly different, with both  
213 BIO and CHIR treated cells losing filamentous actin localisation, which is normally at the  
214 edge of the cell (see Figure 3M, O, white arrowheads) and generating spiky protrusions (Fig  
215 3N, 3P, yellow arrowheads). Microtubule organization was also disrupted in BIO-treated  
216 cells. In normal cells, stabilized microtubules (marked by acetylated tubulin) extend from the  
217 centrosome toward the leading edge of the cell (see Figure 3Q). In BIO-treated cells  
218 stabilized microtubules appeared to accumulate perinuclearly (Figure 3R, Supplemental  
219 Figure 5C). We also examined a marker for unstable microtubules (YL1-2<sup>35</sup>) and found a  
220 significant decrease in this population, which also accumulated primarily at the rear of the  
221 cell, behind the nucleus (Figure 3S-T, arrowheads and Supplemental Figure 5D). Finally, we  
222 examined membrane dynamics in both mutants and BIO-treated explants from mice carrying

223 a genetically labelled membrane GFP (Figure 3U-W). In the control explants, a large  
224 proportion of the GFP was internalised within the cell, suggesting recycling of the membrane  
225 (Figure 3U, closed arrowhead). Instead, both treated and mutant cells had very strong  
226 expression of GFP at the cell membrane (Figure 3V, 3W, open arrowheads). Consistent with  
227 these findings, we also found an accumulation of  $\beta$ -catenin at the membrane in BIO-treated  
228 explants (Figure 3X-Y), suggesting that loss of GSK3 activity led to extremely stable  
229 membrane dynamics compared to controls.

230 One candidate GSK-3 substrate is focal adhesion kinase (FAK), a well-known  
231 regulator of cell motility, which controls focal adhesion dynamics and turnover required for  
232 formation of branched actin (as opposed to linear actin). In motile cells, FAK is regulated by  
233 an activating tyrosine phosphorylation and a series of inhibitory serine phosphorylations,  
234 which are mutually exclusive; of these, S722 is a known GSK3 target<sup>36,37</sup>. Consistent with  
235 GSK3 roles in inhibiting FAK, we found that pY-GSK3 (in green) and pY-FAK (in red) were  
236 mutually exclusive in the cytoplasm (Figure 4A-B). In addition, we found that migratory  
237 neural crest cells ordinarily express active pY-FAK in a halo of puncta that are oriented  
238 toward the direction of cell movement, which is toward the right side of all figures (Figure  
239 4C, E, G'). This punctate expression is reminiscent of microspikes, or transient actin-filled  
240 filopods which initiate actin nucleation filaments. Percentage of cells containing pFAK at the  
241 edge was consistently reduced after GSK3 inhibition (Fig 4J-K) along with a loss of branched  
242 actin (Fig 4I) suggesting a loss of lamellipodia-like characteristics. Instead, loss of GSK3 led  
243 to a striking accumulation of active pY397-FAK in long extensions indicating persistent focal  
244 adhesions (Figure 4F, L-M).

245 FAK is thought to control cytoskeletal dynamics by repressing the function of the  
246 small GTPase Rac1<sup>38</sup>. Therefore, the inhibition of FAK activity appears necessary to allow  
247 Rac1 activation. With the accumulation of active FAK in our treated cells, we found that  
248 Rac1 was now excluded from the leading edge of the migratory neural crest cells (compare  
249 Figure 5B to A, arrowheads). Interestingly, we see an increase in Rac1 in nuclei (Figure 5B-  
250 C), which could indicate a more direct role for GSK3 in subcellular localisation of Rac1,  
251 possibly via phosphorylation of the Rac1 regulator nucleophosmin/B23<sup>39,40</sup>. We saw a  
252 concurrent loss of cdc42 localization to the leading edge of the cell (Figure 5D-E). Finally,  
253 since FAK and Rac1 can control lamellipodial movement, we examined the localisation of  
254 lamellipodin, which regulates neural crest migration via the actin effectors Ena/VASP and  
255 Scar/WAVE<sup>41,42</sup>. When GSK3 is inhibited, leading edge localisation of lamellipodin is lost,

256 and surprisingly, lamellipodin also relocalizes to the nucleus (Figure 5F, 5G). As a  
257 consequence, treated neural crest cells fail to generate stable fan-shaped lamellipodia (Figure  
258 5H-K, green arrowheads), with approximately 50% of delaminated cells having unstable  
259 lamellipodia (Figure 5K). We then turned back to genetic mutants to confirm these  
260 phenotypes (Fig 5L-M). In this case, to bypass any complications of GSK3 involvement in  
261 neural crest induction, we turned to a tamoxifen inducible Cre (*pCAAG::CreER<sup>TM</sup>*)<sup>43</sup>,  
262 allowing temporal deletions upon drug addition. As predicted, tamoxifen induced knockout  
263 of *GSK3* led to a loss of the wavelike lamellipodial protrusions, leaving only spiky filopodial  
264 movements in neural crest cells (stills shown in Figure 5L-M and Supplemental Movies 3-5).  
265 All together, this demonstrates that in the absence of GSK3 activity, neural crest cells make  
266 filopodial protrusions at the expense of lamellipodia.

267

### 268 *Anaplastic lymphoma kinase (ALK) is expressed in migratory neural crest cells*

269 Aberrant neural crest development is thought to underlie neuroblastoma, an  
270 aggressive paediatric cancer. Activating mutations in ALK contribute to a subset of  
271 neuroblastoma cases, correlating with poor prognosis<sup>44-49</sup>. Because we saw specific  
272 expression of pY-GSK3 at the leading edge and in migratory neural crest cells, we wondered  
273 whether ALK might be responsible for activating GSK3. First, we set out to check whether  
274 ALK was expressed during the appropriate stages of neural crest development. Expression of  
275 ALK has previously been reported at E10.5, including in the diencephalon and facial  
276 ganglia<sup>50</sup>; however, to our knowledge, there has been no analysis performed during key  
277 neural crest migration stages. To test this, we performed mRNA *in situ* hybridization from  
278 E8.0 onwards (Figure 6A, D). We found that by E8.5, ALK appeared specific to the neural  
279 plate border corresponding to active cranial crest migration (Fig 6A). This expression was  
280 enriched at the neural plate border consistent with a role for ALK in the delaminating neural  
281 crest cells (Figure 6A, 6D). Furthermore, ALK continues to be expressed at 9.5dpc at the  
282 neural plate border, and in a migratory neural crest destined for branchial arch I and II and at  
283 the frontonasal process (Fig 6D). Additional expression was seen in the heart, trunk and  
284 limbs. We also examined localization of the active form of ALK protein. Using an antibody  
285 recognizing ALK carrying a phospho-tyrosine residue (pY1507-ALK), we again found  
286 enrichment of ALK in the right place at the right time to be acting upon GSK3 during neural  
287 crest migration (Fig 6B-F). This neural crest specific expression was recapitulated in explant  
288 cultures, where we noted a lack of ALK protein in neural plates (total ALK, Fig 6G-G')

289 followed by an onset of expression in migratory neural crest cells, which was somewhat  
290 nuclear, with diffuse staining throughout the cell (compare Figure 6H-I').

291

### 292 *Inhibition of ALK activity leads to a loss of pY-GSK3 and phenocopies GSK3 inhibition*

293 To test whether ALK activity is required for tyrosine phosphorylation of GSK3, we  
294 challenged the neural crest explants with specific inhibitors for ALK. These included  
295 crizotinib (CTB), which is currently used as a chemotherapeutic, and AZD3463 (AZD).  
296 Because both of these are dual function inhibitors (CTB blocking ALK and the c-met  
297 receptor<sup>51,52</sup>, and AZD blocking ALK and insulin-like growth factor receptors<sup>53</sup>), we also  
298 treated with the highly selective inhibitor NVP-TAE684 (NVP<sup>54</sup>) (Fig 6L-M). we found that  
299 blocking ALK led to a loss of pY-GSK3 expression in neural crest explants, suggesting that  
300 GSK3 was indeed a target of ALK kinase activity in this context (Fig 6J-M, L').  
301 Furthermore, in all three cases, blocking ALK function phenocopied loss of GSK3 activity  
302 leading to a substantial decrease in delamination of the neural crest and a loss of the  
303 migratory cell population (Figure 5N-Q). We noted that NVP treatment was the most  
304 effective at blocking neural crest migration while CTB had a much milder effect (Fig 6R).  
305 Finally, ALK inhibitors CTB and NVP phenocopied the disruption of the actin cytoskeleton  
306 seen when GSK3 was blocked (Fig 6S-W).

307

### 308 *Neuroblastoma lines with high levels of ALK also express high levels of pY-GSK3*

309 We then wondered whether high levels of ALK activity could drive excessive  
310 activation of GSK3. To test this, we examined nine neuroblastoma lines and found a clear  
311 correlation between levels of total ALK, active (pY-1507) ALK and pY-GSK3 (Figure 7A).  
312 We then focused on the Kelly neuroblastoma line, which carries an activating mutation in  
313 ALK (F1174L)<sup>55</sup> and, as a comparison, LS<sup>56</sup> neuroblastoma cells which had very low levels  
314 of ALK. In western blots, we again found much higher levels of ALK in Kelly cells, with  
315 nearly undetectable levels in LS cells, more similar to that of mouse embryonic fibroblasts  
316 (MEFs) (Figure 7B).

317

### 318 *ALK activity is required for pY-GSK3 in neuroblastoma lines*

319 All together, our data raised the possibility that ALK regulation of GSK3 is a neural  
320 crest specific activity that may have been co-opted during cancer progression. Indeed,  
321 inhibition of ALK in the neuroblastoma lines also decreased pY-GSK3 levels (Figure 7C-D,

322 Supplemental Figure 6). The Kelly neuroblastoma line carries an ALK-F1174L mutation  
323 which renders it somewhat insensitive to the ALK inhibitor crizotinib (CTB)<sup>55</sup>. Therefore, as  
324 with the neural crest explants, we confirmed these findings using the two other inhibitors  
325 AZD and NVP (Figure 7D-E). We found that treatment with ALK inhibitors was sufficient to  
326 decrease phosphorylation of GSK3 (Fig 7E). Treatment with BIO or CHIR also affected pY-  
327 GSK3 levels, consistent with some auto-regulation by GSK3 itself (Fig 7D).

328 Finally, we set out to determine whether the excessive levels of pY-GSK3 could  
329 underlie the aggressive nature of neuroblastomas. If GSK3 activity is downstream of ALK in  
330 this context, we would predict that inhibition of GSK3 in Kelly cells would be sufficient to  
331 limit cell migration. Indeed, using scratch assays where we measured the movement of cells,  
332 we observed that Kelly cell migration was blocked by ALK inhibitors (NVP/AZD) similarly  
333 to GSK3 inhibition (BIO/CHIR) (Figure 8A, C,. As noted before, Kelly cells were resistant to  
334 CTB (Figure 8A, C,).

335 In contrast to the Kelly cells, LS cells, which do not carry the ALK-F1174L variant,  
336 behaved very differently. LS cells had substantially less pY-GSK3, which correlated with  
337 much lower levels of active ALK (pY1507, Figure 7A or pY1586, Supplemental Figure 6A).  
338 LS cells were insensitive to crizotinib treatment (Figure 8B, D and Supplemental Figure 6B-  
339 D). But, while the other ALK inhibitors led to a substantial decrease in the area covered,  
340 examination of the cultures showed substantial cell death (see Figure 8B, bottom right panel).  
341 More interesting, we found that GSK3 inhibition in LS cells elicited an unusual phenotype in  
342 the scratch assays, with cells moving together in aggregates, rather than as single cells  
343 (Figure 8B, arrowheads). It is possible that LS cells have a more “epithelial” morphology  
344 than Kelly cells and that GSK3 loss mimicked the stable cell-cell interactions similar to those  
345 in pre-migratory neural crest cells (Figure 3U-Y). Consistent with our hypotheses,  
346 morphologically, the Kelly cells responded similarly to motile neural crest cells, with BIO  
347 treated Kelly cells appearing compacted with dense actin staining (Fig 8E). Nevertheless,  
348 taken together, our data suggest that ALK activity is closely linked to GSK3 phosphorylation  
349 and activity in primary neural crest and neuroblastoma cells.

350

## 351 **Discussion**

352 A key defining feature of the neural crest lineage is the ability to undergo EMT,  
353 acquire motility, migrate, and, ultimately, to differentiate into diverse cell types during  
354 embryonic development. Aberrant NC development results in neurocristopathies and other

355 malignancies such as cancer. Thus, the same migratory characteristics could contribute to  
356 tumorigenesis and metastasis. The understanding of cellular behaviours in the normal context  
357 can aid our identification of important molecules involved in abnormal cell behaviours.

358 Here, we studied the effect of the serine/threonine kinase GSK3 during mammalian  
359 neural crest migration. Previously, we have found that GSK3 $\beta$  is required for the palate  
360 formation at specific time points during development<sup>6</sup>. This structure depends upon neural  
361 crest migration. However, due to functional redundancy between GSK3 $\alpha$  and GSK3 $\beta$ , the *in*  
362 *vivo* activity has been difficult to study<sup>57</sup>. Furthermore, early loss of GSK3 leads to global  
363 Wnt activation, which can obscure later developmental roles<sup>24,25,58-60</sup>. However, our studies  
364 bypass these early complications and provide a refined understanding of the regulation and  
365 function of GSK3. This effect on neural crest migration appears to be  $\beta$ -catenin independent,  
366 as neural crest specific expression of stabilized  $\beta$ -catenin does not disrupt migration<sup>61</sup>.  
367 Instead, GSK3 appears to act directly on the actin cytoskeleton, changing the dynamics of  
368 lamellipodial formation. Our data demonstrate that this regulation may be via regulation of  
369 FAK localization, as well as key downstream factors including Rac1, cdc42 and lamellipodin.  
370 Interestingly, neural crest specific deletion of *FAK*, *Rac1*, *cdc42* and *lpd* all have a range of  
371 craniofacial anomalies<sup>62,63</sup>. However, it is worth noting that in our assays, we predominantly  
372 found that these proteins were relocalised, and thus it is difficult to directly compare our  
373 observations with the published null phenotypes. Nevertheless, these observations are worth  
374 further in-depth study.

375 GSK3 can also regulate the dynamics of the actin cytoskeleton, microtubules and  
376 cell to matrix adhesions<sup>64</sup>. To date, polarized inhibition via phosphorylation of S9 of  
377 GSK3 $\beta$  has been thought to be the main mechanism for establishment of cell polarity,  
378 especially in astrocytes<sup>32</sup>, and is also critical for glioma cell invasion<sup>65</sup>. All of these  
379 scenarios depend on negative regulation of GSK3. Importantly, contrary to the neuronal  
380 cell scenario, we find GSK3 inhibition via serine phosphorylation is not necessary for  
381 neural crest migration (Supplementary Figure 4). However, given the complexity of GSK3  
382 regulation, it would be interesting to see whether combining phosphorylation mutations on  
383 the activating tyrosines and inhibitory serines has an additive effect on neural crest  
384 migration.

385 Most important, we find that neural crest cell migration depends on GSK3 activity,  
386 and that this correlates with high levels of tyrosine phosphorylation via ALK. While there  
387 are other kinases which may be regulating GSK3 phosphorylation, including GSK3 itself<sup>16</sup>,

388 the association with ALK in the context of neuroblastoma is particularly compelling.  
389 However, future studies should include other tyrosine kinases which may be  
390 phosphorylating GSK3. For instance, it has been reported that PYK2<sup>66</sup>, a putative  
391 mammalian homologue of ZAK1, a kinase found in *Dictyostelium* shown to phosphorylate  
392 GSK3 $\beta$  at Y216. However, there is still no clear evidence on how this finding could relate  
393 to mammals. In pathological conditions, pY216-GSK3 $\beta$  has been found in prostate cancer,  
394 and Src was found to promote this phosphorylation, and with it, cancer progression and  
395 invasion<sup>67</sup>. These other kinases are worth considering in the future, and may be necessary  
396 to regulate sub-populations of GSK3.

397         Particularly intriguing was the prediction that GSK3 $\alpha$  is a putative ALK substrate  
398 in cancer cells<sup>18</sup>. ALK is negatively correlated to neuroblastoma prognosis, with  
399 hyperactivating mutations of this kinase found in some of these aggressive tumors.  
400 Therefore, the discovery that pY-GSK3 was specifically expressed in delaminating and  
401 migratory neural crest cells, and that this correlated with ALK-positive neuroblastoma cells  
402 was extremely exciting. The additional novel discovery that ALK inhibition perturbs  
403 neural crest migration as well as expression of pY-GSK3 provides strong evidence for a  
404 new signaling cascade regulating neural crest cellular behaviour. Finally, because we  
405 focused on cell motility and lamellipodia formation, we cannot exclude the possibility that  
406 the ALK-GSK3 pathway has additional or longer-term effects on neural crest  
407 differentiation. Neuroblastoma lines carrying ALK-F1174L have also has been suggested  
408 to regulate serine (S9) phosphorylation of GSK3 $\beta$  via activation of the PI3K/AKT  
409 pathway. This leads to the stabilization of MYCN resulting in the formation of aggressive,  
410 highly penetrant tumours<sup>45</sup>. Because this serine phosphorylation was not required in the  
411 endogenous neural crest, we did not address the status of inhibited (phospho-serine) GSK3  
412 in neuroblastoma cells. Nevertheless, this raises the possibility that phosphorylation events  
413 are necessary to set up distinct pools of GSK3 within the cell, which then regulate cell  
414 motility, transcriptional activity or protein localisation.

415         All together, our study demonstrates that the timing and control of active GSK3  
416 within the embryo plays important roles during multiple steps in neural crest development.  
417 These lessons from the embryo improve our understanding of the pathological misregulation  
418 of key kinases, in neuroblastoma and congenital anomalies, and may have broader  
419 implications for cell motility in diverse systems.

420

420 **Materials and Methods**

421

422 Animal Procedures

423 All animal work was performed at King's College London in accordance with UK  
424 Home Office Project License 70/7441 (KJL).

425 Mouse strains: CD-1 mice were obtained from Charles River Laboratories. *GSK3 $\alpha$ <sup>lacZ</sup>*,  
426 *GSK3 $\beta$ <sup>lacZ</sup>*, *GSK3 $\alpha$ <sup>fl</sup>* and *GSK3 $\beta$ <sup>fl</sup>* mouse lines have all been described previously<sup>57,68</sup>. The  
427 following Cre drivers were used: *pCAGG::Cre-ER<sup>12</sup>*<sup>43</sup>, *Wnt1-cre: Tg(Wnt1-cre)11Rth*<sup>28</sup>. The  
428 following reporter lines were used: *R26R<sup>mT-mG</sup>*: *GT(Rosa)R26Sor<sup>Tm4(ACTB-tdTomato-EGFP)Luo</sup>*<sup>69</sup>.  
429 Genotyping was performed as described in original publications.

430 Mouse handling: The gestational ages were determined based on the observation of  
431 vaginal plugs which was considered embryonic day 0.5 (E0.5). Embryos were further staged  
432 by counting the number of somites after dissection. For each experiments, a minimum of  
433 three mutants with litter-matched controls were studied unless otherwise noted.

434 *Xenopus laevis*: Embryos were cultured using standard methods<sup>70</sup>. Staging was  
435 according to Nieuwkoop and Faber<sup>71</sup>.

436

437 Cell culture

438 Mouse embryonic fibroblasts (MEFs) were prepared according to standard procedures  
439 and cultured in Dulbecco's modified Eagle's medium (DMEM, Sigma) supplemented with  
440 10% (v/v) fetal bovine serum (FBS), 2mM L-glutamine, Pen/Strep, 15mM HEPES, b-  
441 mercaptoethanol (all from Invitrogen). Neuroblastoma (NB) cell lines LS and Kelly were  
442 cultured in RPMI media supplemented with 10% (v/v) FBS and Pen/Strep. For tamoxifen  
443 dependent cre deletions in culture, 4-OH-tamoxifen (Sigma H7904-5mg) was applied at  
444 2 $\mu$ g/ml for 24h. After the incubation period, the media was replaced with standard media and  
445 cultured at 37°C and 5.0% CO<sub>2</sub>. Mouse primary cranial neural crest cultures were performed  
446 according to<sup>72</sup>.

447 For cranial mouse neural crest explants, dissections were performed on embryos at 8.5  
448 days post coitum (dpc) and only embryos at the 5-8 somite stages were used. Briefly, the  
449 embryo was positioned to visualize and excise the neural fold. Adjacent tissues, such as  
450 mesoderm, were carefully cleaned from the neural plate. The neural plate was then cultured  
451 on matrigel-coated plates or slides in basal neural crest media at 37°, 5.0% CO<sub>2</sub> for 24h to  
452 allow migration of neural crest cells out of the NP. When drug treatment was applied, it was  
453 added at plating (T=0).

454

455 Neuroblastoma cell lines used are noted followed by the source. All cell lines were  
456 mycoplasma tested. LS<sup>56,73</sup>, DMSZ (ACC 675) lot #1; CHP-212<sup>74</sup>, ATCC CRL-2273 lot  
457 #58063161; Kelly<sup>75,76</sup>, DMSZ (ACC 355) lot #7; SK-N-SH<sup>77</sup>, HPA lot #09/D/005; SH-SY-  
458 5Y<sup>78,79</sup>, DMSZ (ACC 209) lot #12; IMR32<sup>80,81</sup>, HPA lot #04/K/012; BE(2)C<sup>82</sup>, ATCC CRL-  
459 2268 lot #10H023; SK-N-AS<sup>83</sup>, ATCC CRL-2137 lot #58078525; and IMR5<sup>84</sup>, gift from  
460 Martin Eilers, Wurzburg.

461

#### 462 Antibodies

463 Primary antibodies used for immunofluorescence (IF) or Western blotting (WB):

464 mouse phospho GSK3 Tyr279/216 (Millipore 05-413, 1:300 IF; 1:1000 WB)

465 rabbit GSK3b (Cell Signaling #9336)

466 rabbit p75NTR (Millipore 07-476, 1:500 IF)

467 rabbit total ALK (D5F3 Cell Signaling Tech #3633, 1:300 IF)

468 rabbit phospho-Y1507 ALK (Cell Signaling Tech #14678, 1:200 IHC)

469 rabbit pFAK (Abcam 39967, 1:300 IF; 1:1000 WB)

470 rabbit RAC1 (Santa Cruz SC-217, 1:500 IF)

471 mouse CDC42 (Santa Cruz SC-8401, 1:300 IF)

472 rabbit lamellipodin (provided by Krause lab, 1:200 IF)

473 rabbit GAPDH (Cell Signaling #2118)

474 mouse HSP90a/b (Santa Cruz SC-13119, 1:1000 WB)

475 anti-muscle antibody (DHSB, 12/101, supernatant 1:5).

476 Secondary antibodies used:

477 mouse IgG-Alexa 488 (1:1000 IF)

478 mouse IgG Alexa 568 (1:1000 IF)

479 rabbit IgG-Alexa 488 (1:1000 IF)

480 rabbit IgG-Alexa 568 (1:1000 IF)

481 Mouse IgG Peroxidase (1:10,000 WB)

482 Rabbit IgG-Peroxidase (1:10,000 WB)

483

#### 484 Immunoblotting

485 Cells were washed twice with phosphate-buffered saline (PBS) and lysed with RIPA  
486 lysis buffer with added phosphatase inhibitor (PhosStop, Roche) and protease inhibitor  
487 (cOmplete™, Roche). Protein concentrations were determined by Bradford protein assay

488 (BioRad). Proteins were resolved by SDS-PAGE on 4-12% precast gels (NuPAGE®Bis-  
489 Tris), then transferred to PVDF membrane (IPVH00010, Millipore) using Trans-Blot® SD  
490 semi-dry transfer cell (BioRad). Immunoblots were developed using chemiluminescent HRP  
491 substrate (ECL) (Immobilon, Millipore) and ChemiDoc™ Touch Imaging System (BioRad)  
492 for detection. Densitometry was performed using Fiji-ImageJ analysis software and all the  
493 values were normalized to HSP-90 control<sup>85</sup>.

494

#### 495 Embryo fixation and histology

496 Mouse embryos at e10.5 were collected in cold PBS and fixed overnight in 4%  
497 paraformaldehyde (PFA) at 4°C. Mouse embryos at e8.5, e8.75 or e9.5 were collected in cold  
498 PBS and fixed in 4% paraformaldehyde for 2h at 4°C.

499 Samples were subsequently washed in PBS three times at room temperature for 10 min  
500 each time then treated as corresponding subsequent method. For sections, samples were  
501 cryoprotected by incubating at 4°C overnight in graded sucrose solutions in PBS. Tissues  
502 were then embedded in OCT and frozen at -20°C. Heads and bodies were sectioned at 10µm  
503 and frozen at -20°C after drying at RT for 1h. For whole mount mRNA *in situ* hybridization,  
504 β-galactosidase activity and immunohistochemistry, samples were treated according to  
505 standard procedures.

506 *Xenopus* embryos were collected at the indicated stages and fixed for 1 hour in MEMFA  
507 at room temperature, before washing into ethanol for storage.

508 *ALK* cDNA clone was obtained from Source Biosystems (ID D130039F03). *Sox10*  
509 cDNA was a gift of the Pachnis lab<sup>86</sup>. *Life-ActGFP* constructs were a gift of the Mayor lab<sup>41</sup>.

510

#### 511 *Xenopus* cartilage staining

512 Stage 45+ embryos were fixed in MEMFA for 1 hour at room temperature before  
513 washing into ethanol. For cartilage staining embryos were washed into a 0.15% alcian blue  
514 solution (70% EtOH/30% acetic acid) at room temperature for 3 days. When suitably stained,  
515 embryos were rinsed 3x 15 mins in 95% EtOH. Rehydration was done stepwise into 2%  
516 KOH then washed from 2%KOH stepwise into 80% glycerol/20% 2%KOH, 1 hour per wash  
517 before washing overnight into the final solution. Dissection of cartilages was then performed  
518 to increase visibility of craniofacial cartilages.

519

#### 520 Dissection of *Xenopus laevis* neural crest and grafts

521 2-cell stage embryos were microinjected with membrane GFP or lifeact-GFP and then  
522 cultured at 15°C until they reached an appropriate stage. The procedure followed to obtain  
523 clean neural crest was as Milet and Monsoro-Burq<sup>87</sup>. Neural crest explants were plated in  
524 fibronectin-covered slides to study in vitro migration. They were incubated under control and  
525 0.5mM BIO at time=0. Explants were examined 8h to 24h later, as indicated. For whole  
526 mount and grafts, the embryos were incubated in control and 15mM BIO and collected when  
527 they reached the desired stage.

528

#### 529 Drug treatments.

530 All drugs were prepared at the concentration indicated, in the corresponding standard  
531 media for each cell type. GSK3 inhibitor 6-Bromoindirubin-3'-oxime, BIO (Calbiochem,  
532 361550) was re-suspended in a stock solution of 140mM in DMSO and stored at -20°C until  
533 use for either mouse or *Xenopus laevis* experiments. The ALK inhibitor crizotinib (CTB) was  
534 re-suspended in a stock solution of 5.5mM in DMSO. The ALK inhibitor AZD3463  
535 (Selleckchem, S7106) was re-suspended in a stock solution of 20mM in DMSO. All  
536 compounds were then further diluted in the appropriate media. For MEFs and NB cell lines,  
537 treatments were added when cells were at a confluence of at least 80%. Control treatments  
538 were performed at the corresponding DMSO concentration.

539 *Xenopus* embryos were incubated in 12-well plates, 20 embryos per well. For GSK3  
540 inhibition 15 µM BIO (Calbiochem), was added to media or as otherwise indicated. Control  
541 embryos were incubated in 0.5% DMSO in media.

542

#### 543 Neuroblastoma cell scratch assay and single cell tracking

544 Cells were cultured to confluence in a 96-well ImageLock™ plate (IncuCyte™), in  
545 neuroblastoma media. At this point the cells were starved overnight in 2% FBS. For the  
546 scratch, a 96-pin mechanical device (WoundMaker™) was used to create homogeneous 700-  
547 800µm wounds in the confluent monolayers after starvation. For detailed manual see  
548 IncuCyte® Cell Migration Kit (Essen Bioscience). The following treatments, diluted in  
549 starvation media, were applied to the cells prior to the scratch making: 1.5µM AZD-3463,  
550 1.5µM Crizotinib (CTB), 1.0 µM NVP-TAE684, 0.5µM BIO, 1.0µM CHIR 99021 and  
551 DMSO as control. The plates were then incubated and scanned in the IncuCyte® system at  
552 the rate of 1 scan/hour for up to 36 hours, but analysis was performed at 24-hour time point.  
553 Image processing and all the analysis were made using the IncuCyte® ZOOM Software.  
554 Significance was based on two-tailed t-test.

555

556 Microscopy and Image Analysis

557 Live imaging was obtained using Nikon A1R. Confocal z-stacks were obtained using a Leica

558 TCS SP5 DM16000. Image sequences were reconstructed using Fiji-ImageJ analysis

559 software.

560

560 **References**

561

562 1 Carmona-Fontaine, C. *et al.* Contact inhibition of locomotion in vivo controls  
563 neural crest directional migration. *Nature* **456**, 957-961,  
564 doi:10.1038/nature07441 (2008).

565 2 Stolfi, A., Ryan, K., Meinertzhagen, I. A. & Christiaen, L. Migratory neuronal  
566 progenitors arise from the neural plate borders in tunicates. *Nature* **527**, 371-  
567 374, doi:10.1038/nature15758 (2015).

568 3 Buitrago-Delgado, E., Nordin, K., Rao, A., Geary, L. & LaBonne, C.  
569 NEURODEVELOPMENT. Shared regulatory programs suggest retention of  
570 blastula-stage potential in neural crest cells. *Science* **348**, 1332-1335,  
571 doi:10.1126/science.aaa3655 (2015).

572 4 Simoes-Costa, M. & Bronner, M. E. Reprogramming of avian neural crest axial  
573 identity and cell fate. *Science* **352**, 1570-1573, doi:10.1126/science.aaf2729  
574 (2016).

575 5 Kaufman, C. K. *et al.* A zebrafish melanoma model reveals emergence of neural  
576 crest identity during melanoma initiation. *Science* **351**, aad2197,  
577 doi:10.1126/science.aad2197 (2016).

578 6 Jiang, M., Stanke, J. & Lahti, J. M. The connections between neural crest  
579 development and neuroblastoma. *Current topics in developmental biology* **94**, 77-  
580 127, doi:10.1016/B978-0-12-380916-2.00004-8 (2011).

581 7 Olsen, R. R. *et al.* MYCN induces neuroblastoma in primary neural crest cells.  
582 *Oncogene*, doi:10.1038/onc.2017.128 (2017).

583 8 Schulte, J. H. *et al.* MYCN and ALKF1174L are sufficient to drive neuroblastoma  
584 development from neural crest progenitor cells. *Oncogene* **32**, 1059-1065,  
585 doi:10.1038/onc.2012.106 (2013).

586 9 Liu, K. J., Arron, J. R., Stankunas, K., Crabtree, G. R. & Longaker, M. T. Chemical  
587 rescue of cleft palate and midline defects in conditional GSK-3beta mice. *Nature*  
588 **446**, 79-82 (2007).

589 10 Doble, B. W. & Woodgett, J. R. GSK-3: tricks of the trade for a multi-tasking  
590 kinase. *J Cell Sci* **116**, 1175-1186 (2003).

591 11 Frame, S. & Cohen, P. GSK3 takes centre stage more than 20 years after its  
592 discovery. *Biochem J* **359**, 1-16 (2001).

593 12 Sutherland, C. What Are the bona fide GSK3 Substrates? *International journal of*  
594 *Alzheimer's disease* **2011**, 505607, doi:10.4061/2011/505607 (2011).

595 13 McManus, E. J. *et al.* Role that phosphorylation of GSK3 plays in insulin and Wnt  
596 signalling defined by knockin analysis. *The EMBO journal* **24**, 1571-1583,  
597 doi:10.1038/sj.emboj.7600633 (2005).

598 14 Salic, A., Lee, E., Mayer, L. & Kirschner, M. W. Control of beta-catenin stability:  
599 reconstitution of the cytoplasmic steps of the wnt pathway in *Xenopus* egg  
600 extracts. *Mol Cell* **5**, 523-532 (2000).

601 15 Stamos, J. L., Chu, M. L., Enos, M. D., Shah, N. & Weis, W. I. Structural basis of GSK-  
602 3 inhibition by N-terminal phosphorylation and by the Wnt receptor LRP6. *eLife*  
603 **3**, e01998, doi:10.7554/eLife.01998 (2014).

604 16 Hughes, K., Nikolakaki, E., Plyte, S. E., Totty, N. F. & Woodgett, J. R. Modulation of  
605 the glycogen synthase kinase-3 family by tyrosine phosphorylation. *The EMBO*  
606 *journal* **12**, 803-808 (1993).

- 607 17 Wang, Q. M., Fiol, C. J., DePaoli-Roach, A. A. & Roach, P. J. Glycogen synthase  
608 kinase-3 beta is a dual specificity kinase differentially regulated by tyrosine and  
609 serine/threonine phosphorylation. *J Biol Chem* **269**, 14566-14574 (1994).
- 610 18 Rush, J. *et al.* Immunoaffinity profiling of tyrosine phosphorylation in cancer  
611 cells. *Nature biotechnology* **23**, 94-101, doi:10.1038/nbt1046 (2005).
- 612 19 Maqbool, M. & Hoda, N. GSK3 inhibitors in the therapeutic development of  
613 diabetes, cancer and Neurodegeneration: Past, present and future. *Current*  
614 *pharmaceutical design*, doi:10.2174/1381612823666170714141450 (2017).
- 615 20 Marchena, M. *et al.* Small molecules targeting glycogen synthase kinase 3 as  
616 potential drug candidates for the treatment of retinitis pigmentosa. *Journal of*  
617 *enzyme inhibition and medicinal chemistry* **32**, 522-526,  
618 doi:10.1080/14756366.2016.1265522 (2017).
- 619 21 Yost, C. *et al.* The axis-inducing activity, stability, and subcellular distribution of  
620 beta-catenin is regulated in *Xenopus* embryos by glycogen synthase kinase 3.  
621 *Genes & development* **10**, 1443-1454 (1996).
- 622 22 Pierce, S. B. & Kimelman, D. Regulation of Spemann organizer formation by the  
623 intracellular kinase Xgsk-3. *Development (Cambridge, England)* **121**, 755-765  
624 (1995).
- 625 23 Pierce, S. B. & Kimelman, D. Overexpression of Xgsk-3 disrupts anterior  
626 ectodermal patterning in *Xenopus*. *Developmental biology* **175**, 256-264,  
627 doi:10.1006/dbio.1996.0113 (1996).
- 628 24 Lander, R. *et al.* Interactions between Twist and other core epithelial-  
629 mesenchymal transition factors are controlled by GSK3-mediated  
630 phosphorylation. *Nature communications* **4**, 1542, doi:10.1038/ncomms2543  
631 (2013).
- 632 25 Abbruzzese, G., Cousin, H., Salicioni, A. M. & Alfandari, D. GSK3 and Polo-like  
633 kinase regulate ADAM13 function during cranial neural crest cell migration.  
634 *Molecular biology of the cell* **25**, 4072-4082, doi:10.1091/mbc.E14-05-0970  
635 (2014).
- 636 26 Maj, E. *et al.* Controlled levels of canonical Wnt signaling are required for neural  
637 crest migration. *Developmental biology*, doi:10.1016/j.ydbio.2016.06.022 (2016).
- 638 27 Rabadan, M. A. *et al.* Delamination of neural crest cells requires transient and  
639 reversible Wnt inhibition mediated by Dact1/2. *Development (Cambridge,*  
640 *England)* **143**, 2194-2205, doi:10.1242/dev.134981 (2016).
- 641 28 Danielian, P. S., Muccino, D., Rowitch, D. H., Michael, S. K. & McMahon, A. P.  
642 Modification of gene activity in mouse embryos in utero by a tamoxifen-inducible  
643 form of Cre recombinase. *Curr Biol* **8**, 1323-1326 (1998).
- 644 29 Meijer, L. *et al.* GSK-3-selective inhibitors derived from Tyrian purple indirubins.  
645 *Chemistry & biology* **10**, 1255-1266 (2003).
- 646 30 Ring, D. B. *et al.* Selective glycogen synthase kinase 3 inhibitors potentiate insulin  
647 activation of glucose transport and utilization in vitro and in vivo. *Diabetes* **52**,  
648 588-595 (2003).
- 649 31 Eickholt, B. J., Walsh, F. S. & Doherty, P. An inactive pool of GSK-3 at the leading  
650 edge of growth cones is implicated in Semaphorin 3A signaling. *J Cell Biol* **157**,  
651 211-217 (2002).
- 652 32 Etienne-Manneville, S. & Hall, A. Cdc42 regulates GSK-3beta and adenomatous  
653 polyposis coli to control cell polarity. *Nature* **421**, 753-756,  
654 doi:10.1038/nature01423 (2003).

- 655 33 Trivedi, N., Marsh, P., Goold, R. G., Wood-Kaczmar, A. & Gordon-Weeks, P. R.  
656 Glycogen synthase kinase-3beta phosphorylation of MAP1B at Ser1260 and  
657 Thr1265 is spatially restricted to growing axons. *J Cell Sci* **118**, 993-1005,  
658 doi:10.1242/jcs.01697 (2005).
- 659 34 Lucas, F. R., Goold, R. G., Gordon-Weeks, P. R. & Salinas, P. C. Inhibition of GSK-  
660 3beta leading to the loss of phosphorylated MAP-1B is an early event in axonal  
661 remodelling induced by WNT-7a or lithium. *J Cell Sci* **111 ( Pt 10)**, 1351-1361  
662 (1998).
- 663 35 Goold, R. G. & Gordon-Weeks, P. R. The MAP kinase pathway is upstream of the  
664 activation of GSK3beta that enables it to phosphorylate MAP1B and contributes  
665 to the stimulation of axon growth. *Molecular and cellular neurosciences* **28**, 524-  
666 534, doi:10.1016/j.mcn.2004.11.005 (2005).
- 667 36 Bianchi, M. *et al.* Regulation of FAK Ser-722 phosphorylation and kinase activity  
668 by GSK3 and PP1 during cell spreading and migration. *Biochem J* **391**, 359-370,  
669 doi:10.1042/BJ20050282 (2005).
- 670 37 Jacamo, R., Jiang, X., Lunn, J. A. & Rozengurt, E. FAK phosphorylation at Ser-843  
671 inhibits Tyr-397 phosphorylation, cell spreading and migration. *Journal of*  
672 *cellular physiology* **210**, 436-444, doi:10.1002/jcp.20870 (2007).
- 673 38 Hall, A. Rho family GTPases. *Biochemical Society transactions* **40**, 1378-1382,  
674 doi:10.1042/BST20120103 (2012).
- 675 39 Navarro-Lerida, I. *et al.* Rac1 nucleocytoplasmic shuttling drives nuclear shape  
676 changes and tumor invasion. *Developmental cell* **32**, 318-334,  
677 doi:10.1016/j.devcel.2014.12.019 (2015).
- 678 40 Ramos-Echazabal, G., China, G., Garcia-Fernandez, R. & Pons, T. In silico studies  
679 of potential phosphoresidues in the human nucleophosmin/B23: its kinases and  
680 related biological processes. *Journal of cellular biochemistry* **113**, 2364-2374,  
681 doi:10.1002/jcb.24108 (2012).
- 682 41 Law, A. L. *et al.* Lamellipodin and the Scar/WAVE complex cooperate to promote  
683 cell migration in vivo. *J Cell Biol* **203**, 673-689, doi:10.1083/jcb.201304051  
684 (2013).
- 685 42 Krause, M. *et al.* Lamellipodin, an Ena/VASP ligand, is implicated in the  
686 regulation of lamellipodial dynamics. *Developmental cell* **7**, 571-583,  
687 doi:10.1016/j.devcel.2004.07.024 (2004).
- 688 43 Hayashi, S. & McMahon, A. P. Efficient recombination in diverse tissues by a  
689 tamoxifen-inducible form of Cre: a tool for temporally regulated gene  
690 activation/inactivation in the mouse. *Developmental biology* **244**, 305-318,  
691 doi:10.1006/dbio.2002.0597 (2002).
- 692 44 Barone, G., Anderson, J., Pearson, A. D., Petrie, K. & Chesler, L. New strategies in  
693 neuroblastoma: Therapeutic targeting of MYCN and ALK. *Clinical cancer research*  
694 *: an official journal of the American Association for Cancer Research* **19**, 5814-  
695 5821, doi:10.1158/1078-0432.CCR-13-0680 (2013).
- 696 45 Berry, T. *et al.* The ALK(F1174L) mutation potentiates the oncogenic activity of  
697 MYCN in neuroblastoma. *Cancer cell* **22**, 117-130, doi:10.1016/j.ccr.2012.06.001  
698 (2012).
- 699 46 Chen, Y. *et al.* Oncogenic mutations of ALK kinase in neuroblastoma. *Nature* **455**,  
700 971-974, doi:10.1038/nature07399 (2008).
- 701 47 George, R. E. *et al.* Activating mutations in ALK provide a therapeutic target in  
702 neuroblastoma. *Nature* **455**, 975-978, doi:10.1038/nature07397 (2008).

- 703 48 Janoueix-Lerosey, I. *et al.* Somatic and germline activating mutations of the ALK  
704 kinase receptor in neuroblastoma. *Nature* **455**, 967-970,  
705 doi:10.1038/nature07398 (2008).
- 706 49 Mosse, Y. P. *et al.* Identification of ALK as a major familial neuroblastoma  
707 predisposition gene. *Nature* **455**, 930-935, doi:10.1038/nature07261 (2008).
- 708 50 Vernersson, E. *et al.* Characterization of the expression of the ALK receptor  
709 tyrosine kinase in mice. *Gene expression patterns : GEP* **6**, 448-461,  
710 doi:10.1016/j.modgep.2005.11.006 (2006).
- 711 51 Christensen, J. G. *et al.* Cytoreductive antitumor activity of PF-2341066, a novel  
712 inhibitor of anaplastic lymphoma kinase and c-Met, in experimental models of  
713 anaplastic large-cell lymphoma. *Molecular cancer therapeutics* **6**, 3314-3322,  
714 doi:10.1158/1535-7163.MCT-07-0365 (2007).
- 715 52 Zou, H. Y. *et al.* An orally available small-molecule inhibitor of c-Met, PF-  
716 2341066, exhibits cytoreductive antitumor efficacy through antiproliferative and  
717 antiangiogenic mechanisms. *Cancer research* **67**, 4408-4417, doi:10.1158/0008-  
718 5472.CAN-06-4443 (2007).
- 719 53 Wang, Y. *et al.* Novel ALK inhibitor AZD3463 inhibits neuroblastoma growth by  
720 overcoming crizotinib resistance and inducing apoptosis. *Scientific reports* **6**,  
721 19423, doi:10.1038/srep19423 (2016).
- 722 54 Galkin, A. V. *et al.* Identification of NVP-TAE684, a potent, selective, and  
723 efficacious inhibitor of NPM-ALK. *Proceedings of the National Academy of*  
724 *Sciences of the United States of America* **104**, 270-275,  
725 doi:10.1073/pnas.0609412103 (2007).
- 726 55 Tucker, E. R., Danielson, L. S., Innocenti, P. & Chesler, L. Tackling Crizotinib  
727 Resistance: The Pathway from Drug Discovery to the Pediatric Clinic. *Cancer*  
728 *research* **75**, 2770-2774, doi:10.1158/0008-5472.CAN-14-3817 (2015).
- 729 56 Rudolph, G., Schilbach-Stuckle, K., Handgretinger, R., Kaiser, P. & Hameister, H.  
730 Cytogenetic and molecular characterization of a newly established  
731 neuroblastoma cell line LS. *Human genetics* **86**, 562-566 (1991).
- 732 57 Barrell, W. B., Szabo-Rogers, H. L. & Liu, K. J. Novel reporter alleles of GSK-3alpha  
733 and GSK-3beta. *PloS one* **7**, e50422, doi:10.1371/journal.pone.0050422 (2012).
- 734 58 Saint-Jeannet, J. P., He, X., Varmus, H. E. & Dawid, I. B. Regulation of dorsal fate in  
735 the neuraxis by Wnt-1 and Wnt-3a. *Proceedings of the National Academy of*  
736 *Sciences of the United States of America* **94**, 13713-13718 (1997).
- 737 59 Chang, C. & Hemmati-Brivanlou, A. Neural crest induction by Xwnt7B in Xenopus.  
738 *Developmental biology* **194**, 129-134, doi:10.1006/dbio.1997.8820 (1998).
- 739 60 Garcia-Castro, M. I., Marcelle, C. & Bronner-Fraser, M. Ectodermal Wnt function  
740 as a neural crest inducer. *Science* **297**, 848-851 (2002).
- 741 61 Hari, L. *et al.* Temporal control of neural crest lineage generation by Wnt/beta-  
742 catenin signaling. *Development (Cambridge, England)* **139**, 2107-2117,  
743 doi:10.1242/dev.073064 (2012).
- 744 62 Thomas, P. S., Kim, J., Nunez, S., Glogauer, M. & Kaartinen, V. Neural crest cell-  
745 specific deletion of Rac1 results in defective cell-matrix interactions and severe  
746 craniofacial and cardiovascular malformations. *Developmental biology* **340**, 613-  
747 625, doi:10.1016/j.ydbio.2010.02.021 (2010).
- 748 63 Liu, Y. *et al.* Inactivation of Cdc42 in neural crest cells causes craniofacial and  
749 cardiovascular morphogenesis defects. *Developmental biology* **383**, 239-252,  
750 doi:10.1016/j.ydbio.2013.09.013 (2013).

- 751 64 Sun, T., Rodriguez, M. & Kim, L. Glycogen synthase kinase 3 in the world of cell  
752 migration. *Development, growth & differentiation* **51**, 735-742,  
753 doi:10.1111/j.1440-169X.2009.01141.x (2009).
- 754 65 Zou, Q., Hou, Y., Shen, F. & Wang, Y. Polarized regulation of glycogen synthase  
755 kinase-3beta is important for glioma cell invasion. *PloS one* **8**, e81814,  
756 doi:10.1371/journal.pone.0081814 (2013).
- 757 66 Hartigan, J. A., Xiong, W. C. & Johnson, G. V. Glycogen synthase kinase 3beta is  
758 tyrosine phosphorylated by PYK2. *Biochemical and biophysical research*  
759 *communications* **284**, 485-489, doi:10.1006/bbrc.2001.4986 (2001).
- 760 67 Goc, A. *et al.* Targeting Src-mediated Tyr216 phosphorylation and activation of  
761 GSK-3 in prostate cancer cells inhibit prostate cancer progression in vitro and in  
762 vivo. *Oncotarget* **5**, 775-787, doi:10.18632/oncotarget.1770 (2014).
- 763 68 He, F. *et al.* Gsk3beta is required in the epithelium for palatal elevation in mice.  
764 *Dev Dyn* **239**, 3235-3246, doi:10.1002/dvdy.22466 (2010).
- 765 69 Muzumdar, M. D., Tasic, B., Miyamichi, K., Li, L. & Luo, L. A global double-  
766 fluorescent Cre reporter mouse. *Genesis* **45**, 593-605, doi:10.1002/dvg.20335  
767 (2007).
- 768 70 Sive, H. G., RM; Harland RM. *Early Development of Xenopus laevis: A Laboratory*  
769 *Manual*. (Cold Spring Harbor Laboratory Press, 2010).
- 770 71 Faber, J. N., P.D. *Normal Table of Xenopus Laevis (Daudin)*. (Garland Science,  
771 1994).
- 772 72 Ishii, M. *et al.* A stable cranial neural crest cell line from mouse. *Stem cells and*  
773 *development* **21**, 3069-3080, doi:10.1089/scd.2012.0155 (2012).
- 774 73 Corvi, R., Savelyeva, L., Amler, L., Handgretinger, R. & Schwab, M. Cytogenetic  
775 evolution of MYCN and MDM2 amplification in the neuroblastoma LS tumour and  
776 its cell line. *European journal of cancer* **31A**, 520-523 (1995).
- 777 74 Hay, R., Park, J.-G. & Gazdar, A. F. *Atlas of human tumor cell lines*. (Academic  
778 Press, 1994).
- 779 75 Schwab, M. *et al.* Amplified DNA with limited homology to myc cellular oncogene  
780 is shared by human neuroblastoma cell lines and a neuroblastoma tumour.  
781 *Nature* **305**, 245-248 (1983).
- 782 76 Preis, P. N. *et al.* Neuronal cell differentiation of human neuroblastoma cells by  
783 retinoic acid plus herbimycin A. *Cancer research* **48**, 6530-6534 (1988).
- 784 77 Fransson, S. *et al.* Intragenic anaplastic lymphoma kinase (ALK) rearrangements:  
785 translocations as a novel mechanism of ALK activation in neuroblastoma tumors.  
786 *Genes, chromosomes & cancer* **54**, 99-109, doi:10.1002/gcc.22223 (2015).
- 787 78 Biedler, J. L., Helson, L. & Spengler, B. A. Morphology and growth, tumorigenicity,  
788 and cytogenetics of human neuroblastoma cells in continuous culture. *Cancer*  
789 *research* **33**, 2643-2652 (1973).
- 790 79 Ross, R. A., Spengler, B. A. & Biedler, J. L. Coordinate morphological and  
791 biochemical interconversion of human neuroblastoma cells. *Journal of the*  
792 *National Cancer Institute* **71**, 741-747 (1983).
- 793 80 Mazot, P. *et al.* Internalization and down-regulation of the ALK receptor in  
794 neuroblastoma cell lines upon monoclonal antibodies treatment. *PloS one* **7**,  
795 e33581, doi:10.1371/journal.pone.0033581 (2012).
- 796 81 Tumilowicz, J. J., Nichols, W. W., Cholon, J. J. & Greene, A. E. Definition of a  
797 continuous human cell line derived from neuroblastoma. *Cancer research* **30**,  
798 2110-2118 (1970).

799 82 Ciccarone, V., Spengler, B. A., Meyers, M. B., Biedler, J. L. & Ross, R. A. Phenotypic  
800 diversification in human neuroblastoma cells: expression of distinct neural crest  
801 lineages. *Cancer research* **49**, 219-225 (1989).  
802 83 Sugimoto, T. *et al.* Determination of cell surface membrane antigens common to  
803 both human neuroblastoma and leukemia-lymphoma cell lines by a panel of 38  
804 monoclonal antibodies. *Journal of the National Cancer Institute* **73**, 51-57 (1984).  
805 84 Brockmann, M. *et al.* Small molecule inhibitors of aurora-a induce proteasomal  
806 degradation of N-myc in childhood neuroblastoma. *Cancer cell* **24**, 75-89,  
807 doi:10.1016/j.ccr.2013.05.005 (2013).  
808 85 Taylor, S. C., Berkelman, T., Yadav, G. & Hammond, M. A defined methodology for  
809 reliable quantification of Western blot data. *Molecular biotechnology* **55**, 217-  
810 226, doi:10.1007/s12033-013-9672-6 (2013).  
811 86 Barlow, A., de Graaff, E. & Pachnis, V. Enteric nervous system progenitors are  
812 coordinately controlled by the G protein-coupled receptor EDNRB and the  
813 receptor tyrosine kinase RET. *Neuron* **40**, 905-916 (2003).  
814 87 Milet, C. & Monsoro-Burq, A. H. Dissection of *Xenopus laevis* neural crest for in  
815 vitro explant culture or in vivo transplantation. *Journal of visualized experiments* :  
816 *JoVE*, doi:10.3791/51118 (2014).  
817  
818  
819

819 **Supplementary Information** included below.

820 **Acknowledgements:** We thank J. Wallingford and M. Dionne for critical reading of the  
821 manuscript; M. Ishii, R. Maxson, P. Gordon-Weeks and Roberto Mayor for advice and help;  
822 and the NHH BSU and University of Portsmouth EXRC for animals. LC and co-workers are  
823 funded by Cancer Research UK and Children with Cancer UK. KJL and co-workers are  
824 funded by the Biotechnology and Biological Sciences Research Council, UK, the Medical  
825 Research Council, UK, CAPES Brazil and the King's College London Dental Institute  
826 Newland Pedley Fund.

827 **Author Contributions:** SGGM, TB, DD and ALM designed experiments, collected and  
828 analyzed data. HAA collected and analysed data. MK, CP and LC provided crucial reagents.  
829 KJL designed the overall study, collected and analyzed data. SGGM and KJL wrote the paper  
830 with input from all other authors.

831

831 **FIGURE LEGENDS**

832 **Figure 1. GSK3 genes are expressed during neural crest migration in the frog *Xenopus***  
833 ***laevis* and mouse *Mus musculus*.**

834 (A-B) mRNA *in situ* hybridization for *Gsk3α* in *X. laevis* at st 25 (A) show expression in the  
835 pharyngeal pouches, brain, spinal cord and eye vesicle (B). (C-D) *In situ* hybridization for  
836 *Gsk3β* in *X. laevis* at st 25 (C). GSK3β is expressed predominately in the pharyngeal pouches  
837 and the spinal cord as well as regions of the brain (D). (E-F). *GSK3α<sup>lacZ</sup>* is expressed in mice  
838 during neural crest migration stages. (E-E') In an e8.5 embryo *GSK3α<sup>lacZ</sup>* is expressed in the  
839 cephalic mesenchyme, in the neuroepithelium and in the cephalic neural fold. (F) By E9.5-  
840 10, *GSK3α<sup>lacZ</sup>* is highly expressed in the first and second branchial arches (1 and 2) and the  
841 frontonasal prominence. (G-H) *GSK3β<sup>lacZ</sup>* is expressed in mice when neural crest is actively  
842 migrating. (G-G') In E8.5 embryos *GSK3β<sup>lacZ</sup>* is mainly expressed in the neuroectoderm,  
843 restricted to the prospective hindbrain and some areas in the mesenchyme. (H) At e9.5,  
844 *GSK3β<sup>lacZ</sup>* is mainly expressed in BA1 and cranial ganglia, and in the presumptive trigeminal  
845 ganglion.

846 **GSK3α/β are phosphorylated at tyrosines Y216/279 during cranial neural crest cell**  
847 **migration.** (I) Transverse cranial section of E9 mouse showing immunofluorescent staining  
848 for Hoechst/DNA (blue), pY-GSK3 (green) and p75<sup>NTR</sup> (neural crest, red). (J) Schematic of  
849 E8.5 mouse embryo depicting cranial neural crest (CNC) dissection. (K) Brightfield image of  
850 mouse neural crest explant. Neural plates (NP) were dissected from E8.5 embryos and  
851 cultured for 24 hours. Two types of cells surround the NP: pre-migratory neural crest cells  
852 (pNC) which are epithelial, and migratory neural crest (mNC) scale bar, 250μm.

853 (L) Cells migrating away from the premigratory neural crest begin to express pY-GSK3.  
854 Premigratory neural crest (pNC) to the left. All neural crest express p75<sup>NTR</sup> (red). Note in  
855 merge that perinuclear expression of pY-GSK3 is invariably oriented in direction of  
856 migration (L' white arrowheads). (M) Migratory NC cells express pY-GSK3 (green) and p75-  
857 NTR (red). (L-M) scale bars = 25μM. (N) Expression of total GSK3 is ubiquitous in  
858 premigratory and migratory neural crest cells. Scale bar = 25μM.

859 **Figure 2. GSK3 is required for neural crest migration *in vivo*.** (A to H) mRNA *in situ*  
860 hybridization of *Sox10*, which marks migratory neural crest. (A, E) E9.5 mouse embryos. (B-  
861 D, F-H) E10.5 mouse embryos. (A-B, E-F) Dorsal views. (C-D, G-H) Lateral views of E10.5  
862 control embryos. (A-B) In control embryos, *Sox10* expression is absent in the brain (B, red  
863 bracket) but it is highly expressed along the embryo axis. (E-F) Neural crest specific deletion  
864 of GSK3. Dorsal view of E10.5 mutant mouse in which *Sox10* expression has accumulated in  
865 the brain (F, red bracket) (C-D) At E10.5, *Sox10* marks cranial neural crest, which has  
866 migrated into the facial prominences (C, red arrow) and the cranial ganglia, including the  
867 trigeminal ganglia (V) and facial and acoustic nerves (VII/VIII), glossopharyngeal nerve  
868 (IX), vagus nerve (X) and the spinal accessory nerve (XI) (D). (G-H) E10.5 mutant mouse  
869 lost *Sox10* expression, especially in the facial prominences (G, red arrow) and showed  
870 remarkably reduced expression in cranial ganglia and nerves X, XI. The dorsal root ganglia  
871 seem to be unaffected. (I) *Twist* expression marks migratory neural crest. BIO treatment from  
872 st12.5 results in a loss of *twist* expression at st17 (frontal views, st17). BIO treatment from  
873 st12.5 to st19, shows loss of *twist* expression at st20 and st26 (lateral views). The posterior  
874 streams are selectively impaired, red arrows. (J) BIO treatment resulted in a reduction of  
875 Alcian blue stained facial cartilages, which are derived from neural crest. (K) *Twist*  
876 expression shows that cell migration is regained by stage 28, following washout from the  
877 treatment with BIO from st12.5 to st19. (L) Frontal view of a tadpole at stage 45, previously  
878 treated with BIO (st.12.5-19). Note narrowing of the head structures and loss of the mouth  
879 (marked with red lines in control). (M-P') GFP labeled neural crest was grafted into a non-  
880 labeled embryo at stage 17 and grown to st28. GFP labeled cells in control animals have  
881 migrated (N), while those treated with 15 $\mu$ M BIO have not (O-P).  
882

883 **Figure 3. GSK3 activity is required for neural crest cell migration.** (A-B) Neural crest  
884 cells are dissected from st 17 *Xenopus* embryos. (A) Control explants after 8h in culture. (B)  
885 When GSK3 is inhibited (0.5 $\mu$ M BIO) neural crest cells spread significantly less than the  
886 controls. (C) Quantification of the distance migrated  $**p \leq 0.05$ . (D, G, J) Control mouse  
887 explants. (E, H) Explants treated with 0.5 $\mu$ m BIO or 1 $\mu$ M CHIR99021 respectively. Note  
888 decrease in area covered by migratory neural crest (F, refers to D, E; I refers to G, H) (J-L)  
889 Mouse explants from control (J), *Wnt1::cre; GSK3<sup>afl/+</sup>; GSK3<sup>bfl/+</sup>* (K), and *Wnt1::cre;*  
890 *GSK3<sup>afl/fl</sup>; GSK3<sup>bfl/fl</sup>* complete mutants (L). Note decrease in area covered in L (red dotted  
891 line). (M-P) Phalloidin staining (green) labels filamentous actin in neural crest explants. (M,  
892 O) Explants treated with DMSO (control) show accumulation of F-actin in lamellipodia in  
893 the leading edge (white arrowheads). Explants treated with (N) 0.5 $\mu$ m BIO and (P) 1 $\mu$ M  
894 CHIR lack lamellipodia and only show stress fibers at the cell edge (yellow arrowheads) (Q-  
895 T) Microtubules are labeled with acetylated  $\alpha$ -tubulin or YL1-2. Note smooth lamellipodial  
896 edge in control (Q) and spiky protrusions in BIO treated cells (R). YL1-2 tubulin in control  
897 cells is distributed all throughout the cell structure (S); however in BIO treated cells (T), it is  
898 mainly found in a perinuclear zone, at the rear of the nucleus. (U) Cranial neural crest  
899 explants from control E8.5 embryos carrying membrane GFP in the neural crest lineage.  
900 Migrating cells show an elongated morphology and have a dynamic cell-cell contact (see  
901 Supplemental Movies 1, 3, 6). Membrane GFP is unstable and intracellular, likely due to  
902 recycling of cell membranes. (V) In the BIO treatment, cells remain in contact with adjacent  
903 cells and multiple protrusions (yellow arrows). (W) Mutant cells carrying a neural crest  
904 specific deletion of GSK3 (*Wnt1Cre/+; GSK3<sup>afl/fl</sup>; GSK3<sup>bfl/fl</sup>*) lose motility and maintain  
905 stable cell-cell contacts and membrane GFP. (X-Y)  $\beta$ -catenin staining in neural crest  
906 explants. Note how  $\beta$ -catenin is remarkably stable in BIO treated cells (Y), suggesting  
907 increased cell-cell adhesion. (A-L) Scale bar=100 $\mu$ m. (M-Y) Scale bar=25 $\mu$ M.

908 **FIGURE 4. GSK3 allows FAK localisation to establish lamellipodial protrusions at the**  
909 **leading edge in migrating neural crest cells.**

910 (A-B) Immunofluorescence for pFAK-Y397 (pFAK, red) and pY-GSK3 (green). (A) In  
911 control explants pFAK is found at the leading edge of the delaminating cells and in migrating  
912 cells. (B) In migratory neural crest cells, pY-GSK3 and pFAK are mutually exclusive. (C-C')  
913 pFAK is found in puncta at the leading edge of the cell co-localizing with lamellipodia. (D-  
914 D') Upon GSK3 inhibition the cells lose pFAK at the leading edge. (E-F) pFAK accumulates  
915 at the tips of actin-rich fibres. Note increase in length of pFAK associated with actin upon  
916 treatment with BIO (F). (G-H') Similarly, treatment with 1 $\mu$ M CHIR elicits the same  
917 response (white and yellow arrowheads). (A-H) Scale bar=25 $\mu$ M. (I-J) Percentage bar charts  
918 representing a significant decrease in cells with branched actin (I) or showing pFAK puncta  
919 at the leading edge (J) when GSK3 is inhibited with either BIO or CHIR **\*\* $p \leq 0.001$  and**  
920 **\*\*\* $p \leq 0.0001$** . (K-M) Dot plots representing the number of pFAK puncta at the edge (K), the  
921 number of stress fibers containing pFAK (L) and the length of of pFAK (M) in control and  
922 CHIR treated cells; each dot represents one cell. **\*\* $p \leq 0.001$  and \*\*\* $p \leq 0.0001$** .

923

924 **Figure 5. GSK3 is required to establish polarity and to form lamellipodia in migrating**

925 **neural crest cells.** (A-B) GSK3 inhibition increases nuclear RAC1 and reduces cytoplasmic  
926 RAC1 in neural crest cells. (A) In control explants RAC1 (red) is high in the nucleus while in  
927 the cytoplasm it is enriched at cell protrusions (arrowheads). Actin was labeled with  
928 phalloidin (green). (B) In BIO treated explants nuclear RAC1 is high but cytoplasmic  
929 staining is lost (white arrowheads). (C) Relative levels of Rac1 fluorescence in the nucleus or  
930 the cytoplasm, **\*\* $p \leq 0.001$  and \*\*\* $p \leq 0.0001$**  (D-E) GSK3 inhibition reduces expression of  
931 cdc42 in neural crest cells. (D) Cdc42 is cytoplasmic and perinuclear in neural crest cells. (E)  
932 BIO treated explants lose cdc42 staining. (F-G) In controls, anti-lamellipodin (green) stains

933 the ruffled edge of migrating cells. (G) In contrast, BIO-treated cells show increased total  
934 lamellipodin throughout the cell, losing specific localisation at the cell edge. Scale bar,  
935 20 $\mu$ m. (H-I) Brightfield still images from controls (H) or BIO treated samples (I). Control  
936 images show cells form fan-shaped stable lamellipodia and ready to migrate away from the  
937 cluster (H, white arrowheads). In treated cells, despite some cells form stable lamellipodia as  
938 found in controls (I, light blue arrowheads), cells predominantly formed an irregular  
939 protrusion that tend to retract (I, green arrowheads) Scale bar, 500 $\mu$ m (See corresponding  
940 Supplemental Movies 6, 7) (J) Graph showing the number of cells delaminating from the pre-  
941 migratory neural crest cell clusters in two hours. (K) Percentage of delaminating cells which  
942 show stable (persistent) lamellipodia or unstable (short-lived) lamellipodia. (L-M) Still  
943 images of time-lapse showing control mouse neural crest cells (L, supplemental movies 3,5)  
944 and *pCAAG::creER<sup>tm</sup>; GSK3 $\alpha$ <sup>fl/fl</sup>; GSK3 $\beta$ <sup>fl/fl</sup>; Rosa<sup>mtmg/+</sup>* deleted cells (M, supplemental movie  
945 4,5). Upon tamoxifen induced knockout of GSK3, the neural crest cells are unable to migrate  
946 and the cell edge does not form lamellipodia.

947

948 **Figure 6. Inhibition of anaplastic lymphoma kinase leads to decreased levels of pY-**  
949 **GSK3 in mouse neural crest.**

950 (A-F) Anaplastic lymphoma kinase (ALK) is expressed in the neural crest. (A, D) mRNA *in*  
951 *situ* hybridization for *Alk* in e8.5 and e9.5 mouse embryos. (B-C, E-F) Antibody staining for  
952 activated ALK protein shows expression at the neural plate border (red arrows) and in the  
953 branchial arches. (G-I') Staining for total ALK (green). (G) Very little total ALK is present in  
954 the neural plate with some present at the edge of the premigratory neural crest (white  
955 arrowheads). (H) Migratory neural crest cells express higher levels of ALK. (I) In fully  
956 migratory NC cells ALK appears to be nuclear. (G'-I') Anti-ALK merged with Hoechst. (J-  
957 J'') Co-immunostaining of pY-GSK3 (green) and ALK (red) show that ALK is expressed in

958 all cells that express pY-GSK3. (K-K''') Treatment with the ALK inhibitor crizotinib (CTB)  
959 for 24 hours reduces the levels of pY-GSK3. (L'' and M'') Quantitation of loss of pY-GSK3  
960 and ALK fluorescence using the alternative inhibitor NVP-TAE also results in a loss of mean  
961 fluorescence intensity. (N-Q) Bright field images of neural crest explants treated with vehicle  
962 control or three different ALK inhibitors: 1.5 $\mu$ M crizotinib, 1.5 $\mu$ M AZD-3463, or 1 $\mu$ M NVP-  
963 TAE-684. All three treatments showed a loss of migratory neural crest (red dotted lines.) (R)  
964 Area quantification of the premigratory neural crest (pmNC, area depicted by blue dotted  
965 lines covered in N-Q) and the migratory neural crest population (mNC, red dotted lines). A  
966 significant reduction in mNC was seen in AZD and NVP treated explants. (S-V) Phalloidin  
967 staining shows F-actin structure in explants. Hoechst marks nuclei. Note the loss of  
968 lamellipodial structures upon ALK inhibition (U-V) is comparable to BIO treatment (T). (W)  
969 Percentage of cells with lamellipodial formations at the leading edge upon treatment with  
970 GSK3 inhibitor BIO or with ALK inhibitors.

971

972 **Figure 7. Neuroblastoma lines with high levels of active ALK also have high levels of**  
973 **pY-GSK3.** (A) Western blotting of neuroblastoma lines reveals levels of pY-GSK3  
974 correlates with levels of ALK-pY1507 (IMR5, Kelly, Be(2)C, IMR32, SH-SY-5Y, SK-N-  
975 SH). Cell lines with low or no ALK-pY1507 (SK-N-AS, LS, CHP-212) have  
976 correspondingly low levels of pY-GSK3, (B) Western blotting showing that only Kelly cells  
977 have high levels of ALK when compared to mouse embryonic fibroblasts (MEFs) and LS  
978 neuroblastoma cells. (C) Western blotting analysis reveals that, in Kelly cell line, ALK  
979 inhibition with NVP-TAE, results in gradual loss pYGSK-3 $\alpha$  and pYGSK-3 $\beta$  are  
980 significantly reduced after 24h treatment with NVP-TAE, GSK3 inhibition, using BIO or  
981 CHIR, leads to a reduced expression of pY-GSK3, more predominantly is pY-GSK3 $\alpha$   
982 isoform. Some loss of ALK is also seen in NVP treatments. (D) Left, quantification of ALK

983 (220kD) levels normalized to HSP90. Right, quantification of ALK (140 kD) levels  
984 normalized to HSP90. (E) Left, quantification of GSK3 $\alpha$  levels normalized to HSP90; right,  
985 quantification of GSK3 $\beta$  levels normalized to HSP90. Treatments used were 1.5 $\mu$ M  
986 crizotinib, 1.5 $\mu$ M AZD-3463, 1 $\mu$ M NVP-TAE-684 (NVP1), 2 $\mu$ M NVP-TAE-684 (NVP2),  
987 0.5 $\mu$ M BIO, and 1.0 $\mu$ M CHIR99021.

988

989 **Figure 8. GSK3 and ALK inhibition affect migration in neuroblastoma cell lines.**

990 (A, C) Cell migration assay for Kelly neuroblastoma cell line. (A) Representative bright field  
991 still images at start (t=0h) and end (t=24h) time points of the migration assay in Kelly cells  
992 under various GSK3 (0.5 $\mu$ M BIO, 1.0 $\mu$ M CHIR99021) and ALK inhibition treatments  
993 (1.5 $\mu$ M CTB, 1.5 $\mu$ M AZD-3463 and 1.0 $\mu$ M NVP-TAE684). (C) Line graph representing the  
994 percentage of wound coverage over time. Notice that upon NVP-TAE684 (NVP) and BIO  
995 treatments cells do not close the wound as quickly as the control or unaffected CTB samples.  
996 Surprisingly AZD treatment showed the lowest percentage of wound coverage. (B, D) Cell  
997 migration assay for LS neuroblastoma cell line. (B) Representative bright field still images at  
998 start (t=0h) and end time (t=24h) points of the migration assay in LS cells under GSK3  
999 inhibition (0.5 $\mu$ M BIO) and ALK inhibition treatment (1.5 $\mu$ M AZD-3463). Note that upon  
1000 BIO treatment LS cells tend to aggregate and expand into the wound (black arrows). (D) Line  
1001 graph representing the percentage of wound coverage in LS cells. There is a tendency to  
1002 increase migration upon GSK3 inhibition (BIO and CHIR). The lower wound coverage upon  
1003 ALK inhibition treatment correlates with reduced population of cells at the end of the assay  
1004 suggesting a compromise in cell viability under these conditions. (E) Representative images  
1005 of actin staining (phalloidin, green) showing Kelly cells treated with BIO compared to  
1006 controls. Notice the irregular spiky protrusions of cells where GSK3 is inhibited (yellow  
1007 arrowheads). Scale bar, 25  $\mu$ m.

1008

1009 **Supplemental Figure 1. Neural crest migration shows subtle pattern differences**

1010 **depending on specific allele deletion of GSK3.** (A-D') Whole mount *in situ* hybridization

1011 for Sox10 labels migratory neural crest in E9.5 mouse embryos. (A-D) Lateral views. (A'-D')

1012 Dorsal views. (A,A') Sox 10 expression in control embryos is detected in the trigeminal,

1013 branchial arches, frontonasal process and the hindbrain neural crest streams at the level of r4-

1014 r6. Note absence of Sox10 positive cells in the brain (A', red dotted square). (B,B') Neural

1015 crest specific deletion of one allele of each GSK3 isoform results in accumulation of Sox10

1016 expressing cells in the brain (B', red dotted square) and slight reduced expression in branchial

1017 arch 1 (B, red arrowhead). (C,C') Neural crest carrying only one allele of GSK3 $\beta$  showed

1018 subtle accumulation of Sox10 positive cells in the brain (C', red dotted square), and reduced

1019 expression in branchial arch 2 and frontonasal process (red arrowheads). (D,D') Neural crest

1020 specifically carrying only one allele of GSK3 $\alpha$ , showed accumulation of Sox 10 positive

1021 cells in the brain (D', red dotted square) and branchial arch 2 (red line arrowhead).

1022

1023 **Supplemental Figure 2. Timed GSK3 inhibition during frog (*Xenopus laevis*) neural**

1024 **crest migration results in embryo phenotypic defects.** (A-C) Graphs showing the length

1025 measurement of different head structures obtained from st 45 embryos untreated and treated

1026 with GSK3 inhibitor, BIO. The timing of the treatment applied is specified in the X-axis of

1027 each graph. Note that treatments between st.12.5-14 and st.14-16, affect significantly head

1028 features such as the head width (A, yellow bars) and width between eyes (A, green bars), The

1029 same treatment timing has an effect on the lateral measurement of the distance measured

1030 from the posterior edge of the eye (B, red bar) and the anterior edge of the eye (B, blue bar)

1031 to the anterior edge of the embryo, (C) The height of the tail fin was found smaller in

1032 embryos treated from st.14 to st.16. (D) Schematic of craniofacial muscle in tadpoles. 12/101

1033 antibody staining labeling muscle revealed that BIO treatment reduced size of craniofacial  
1034 muscles (green) but does not perturb patterning.

1035

1036 **Supplemental Figure 3. GSK3 inhibition reduces migration of neural crest cells, but**  
1037 **does not affect the number or cell size of migratory cells.** (A) Neural crest explants  
1038 showing in different colour shades the cell populations described. In the middle the neural  
1039 plate (NP), surrounded by a cell population that appears more epithelial, the pre-migratory  
1040 neural crest (pmNC), and finally in the outer ring of the explant, the migratory neural crest  
1041 (mNC) population where cells appear loose and show a mesenchymal phenotype. Neural crest  
1042 cells treated with BIO, show a reduced expansion in the mNC. (B) Dot plots representing the  
1043 absolute values obtained from the NP, pmNC and mNC areas. (C) Dot plots showing the  
1044 number of cells contained in a specific area in control and BIO treated explants. Cell area in  
1045 the pmNC appeared to be increased in BIO treated explants, however in the mNC population  
1046 there was no difference between BIO treated and control samples.

1047

1048 **Supplemental Figure 5. Serine 9/Serine 21 phosphorylation is not necessary for normal**  
1049 **neural crest cell morphology and knockin mice are still sensitive to BIO treatment.** (A)  
1050 Phalloidin staining of neural crest explants from GSK3a<sup>S21A/S21A</sup>; GSK3b<sup>S9A/S9A</sup> embryos  
1051 shows actin at the lead edge of cells and in lamellipodia (white arrowheads). (B) Treatment  
1052 with BIO results in more spiky filopodial protrusions and a loss of leading edge actin. Scale  
1053 bar=20µM.

1054

1055 **Supplemental Figure 4. Effect of GSK3 inhibition on actin, lamellipodia and**  
1056 **microtubules.** (A) Bar chart showing the percentage of cells containing actin at the cell  
1057 leading edge. GSK3 inhibition by two different compounds resulted in a significant reduction

1058 of this percentage. (B) Bar chart showing the percentage of cells that formed fan-shaped  
1059 lamellipodia in control and BIO treated explants. (C) In controls (left) stabilised microtubules  
1060 marked by acetylated  $\alpha$ -tubulin are distributed throughout the cell. In BIO treated samples  
1061 (right), acetylated  $\alpha$ -tubulin staining is localized perinuclearly, with a bias towards the  
1062 leading edge of the cell. Relative fluorescence is somewhat decreased through cell in treated  
1063 explants. Schematic depicts relocalisation of acetylated  $\alpha$ -tubulin staining. (D) In controls  
1064 (left) unstable microtubules, marked by YL1/2, staining are distributed throughout the cell  
1065 while in BIO treated samples YL1/2 staining is perinuclear and biased toward the posterior of  
1066 the cell. Relative fluorescence is significantly decreased in BIO-treated samples ( $*p \leq 0.05$ ).  
1067 Schematic depicting relocalisation of YL1/2 staining.

1068

1069 **Supplemental Figure 6. pY-GSK3 profile in LS neuroblastoma cell line treated with**  
1070 **ALK and GSK3 inhibitors.** (A) Mesoscale discovery (MSD) assay showing relative levels  
1071 of active ALK (pY1586) and total ALK in the neuroblastoma lines shown in Figure 7A. Note  
1072 low levels of ALK in LS cells. (B) LS cells were treated with ALK inhibitors (1.5 $\mu$ M CTB,  
1073 1.5 $\mu$ M AZD-3463 and 1.0 $\mu$ M NVP-TAE684) and with GSK3 inhibitors (0.5 $\mu$ M BIO, 1.0 $\mu$ M  
1074 CHIR99021) for 24h and analysed by western blot for pY-GSK3, total GSK3 and ALK.  
1075 Analysis confirmed absence of ALK in this cell line and a lower amount of pY-GSK3 than  
1076 Kelly cell line (see Figure 7D). Treatment with ALK inhibitors showed that CTB did not  
1077 affect the pY-GSK3 content compared to untreated cells, however AZD and NVP seem to  
1078 have reduced total GSK3 and pY-GSK3 significantly, possibly due to loss of cell viability.  
1079 GSK3 inhibitors maintained total-GSK3 unaffected, however pY-GSK3 expression was not  
1080 detected. (C, D) Relative levels of pY-GSK3 $\alpha$  (C) and pY-GSK3 $\beta$  (D) to loading control.

1081

1082 **Movie S1: Movie of control neural crest explants expressing *LifeAct-GFP*.**

1083 *Xenopus* embryos were injected with mRNA encoding *LifeAct-GFP* at the two-cell  
1084 stage. Neural crest explants were taken at stage 17 and cultured for 8 hours before imaging.  
1085 This movie corresponds to Supplemental Figure 2E-H.

1086 **Movie S2: Movie of BIO treated neural crest explants expressing *LifeAct-GFP*.**

1087 *Xenopus* embryos were injected with mRNA encoding *LifeAct-GFP* at the two-cell  
1088 stage. Neural crest explants were taken at stage 17 and cultured for 8 hours in 0.5 $\mu$ M BIO  
1089 before imaging. This movie corresponds to Supplemental Figure 2I-L.

1090 **Movie S3: Movie of control mouse neural crest**

1091 Movies of migrating neural crest from controls (*GSK3a<sup>fl/fl</sup>*; *GSK3b<sup>fl/fl</sup>*; *Rosa<sup>mTmG/+</sup>*) showing  
1092 normal filopodial and lamellipodial dynamics, as well as migratory behaviour.

1093 **Movie S4 Movie of GSK3 mouse mutant neural crest**

1094 Movies of mutant neural crest explants (*pCAGG::CreER<sup>tm</sup>*; *GSK3a<sup>fl/fl</sup>*; *GSK3b<sup>fl/fl</sup>*;  
1095 *Rosa<sup>mTmG/+</sup>*) showing loss of motility and lamellipodial dynamics, but still showing filopodia  
1096 formation.

1097 **Movie S5 Merge of control and mutant neural crest from Movie S4 and Movie S5**

1098 Experiments shown in Supplemental Movie 3 and 4 were performed in the same dish.  
1099 Two sets of neural crest were plated together: *Cre* negative controls (*GSK3a<sup>fl/fl</sup>*; *GSK3b<sup>fl/fl</sup>*;  
1100 *Rosa<sup>mTmG/+</sup>*) are labeled in red (membrane Tomato, mT) while *Cre* positive mutants  
1101 (*pCAGG::CreER<sup>tm</sup>*; *GSK3a<sup>fl/fl</sup>*; *GSK3b<sup>fl/fl</sup>*; *Rosa<sup>mTmG/+</sup>*) are labeled in green (membrane GFP,  
1102 mG).

1103 **Movie S6: Brightfield movies of control mouse neural crest cells corresponding to**

1104 **Figure 5I.**

1105 Movies of migrating neural crest from controls showing normal filopodial and lamellipodial

1106 dynamics, as well as migratory behaviour.

1107 **Movie S7: Brightfield movies of mouse neural crest cells treated with BIO**

1108 **corresponding to Figure 5H.**

1109 Movies of migrating neural crest from mouse explants treated with BIO showing loss of

1110 lamellipodial dynamics, as well as decreased cell movements.

1111

1112

*Xenopus laevis**Mus musculus*





Gonzalez Malagon et al.,  
Figure 3R, 2017



**I** Cells with branched actin



**J** Cells with pFAK puncta at edge



**K** pFAK puncta at edge



**L** Stress fibers with pFAK



**M** Length of pFAK



**Rac1**

Rac1/actin/Hoechst

**C. Nuclear Rac1****Cytoplasmic Rac1****cdc42**

cdc42/actin/Hoechst

**Lamellipodia**

lamellipodin



Time: 0"

Time: 6'34.5"



Time: 0"

Time: 20'





Gonzalez Malagon et al.,  
Figure 6R, 2017

# Human Neuroblastoma Lines:



### A KELLY cells



### B LS cells



### C KELLY cells



### D LS cells



### E KELLY cells



Control

$Wnt1::Cre/+;GSK3\alpha^{fl/+};GSK3\beta^{fl/+}$

$Wnt1::Cre/+;GSK3\alpha^{fl/fl};GSK3\beta^{fl/+}$

$Wnt1::Cre/+;GSK3\alpha^{fl/+};GSK3\beta^{fl/fl}$



Gonzalez Malagon et al.,  
Supplemental Figure 1R

### A. Width of head and eyes



### B. Distance from eyes to anterior



### C. Height of tail fin



### D. MUSCLE



CONTROL

+15 $\mu$ M BIO



12/101 (muscle)



**B** Area in  $\text{mm}^2$



**C** Number of cells per  $900 \mu\text{m}^2$



**D** Actin at the leading edge



**E** Lamellipodia



**GSK-3 $\alpha$ <sup>S21A/S21A</sup>; GSK-3 $\beta$ <sup>S9A/S9A</sup>**

**CONTROL**

**+BIO**



**Actin**

**Gonzalez Malagon et al.,  
Supplemental Figure 4**

**A****LS CELLS****B****C**
